# Supplementary material
Source: PubMed Central journal article supplement (PMC2971624)

**Supplemental Figure 1.** HPLC-ICP-MS chromatograms of As species in roots, leaves, xylem and phloem exudates of *Ricinus communis* exposed to 10  $\mu\text{M}$  arsenate, DMA or MMA. Note that the dilution factor differed between samples. Method 1: 6.6 mM  $\text{NH}_4\text{H}_2\text{PO}_4$  and 6.6 mM  $\text{NH}_4\text{NO}_3$  (pH 6.3) with a flow rate of 0.6 ml  $\text{min}^{-1}$ ; Method 2: 2 mM  $\text{NH}_4\text{H}_2\text{PO}_4$  and 2 mM  $\text{NH}_4\text{NO}_3$  (pH 6.3) with a flow rate of 0.8 ml  $\text{min}^{-1}$ .

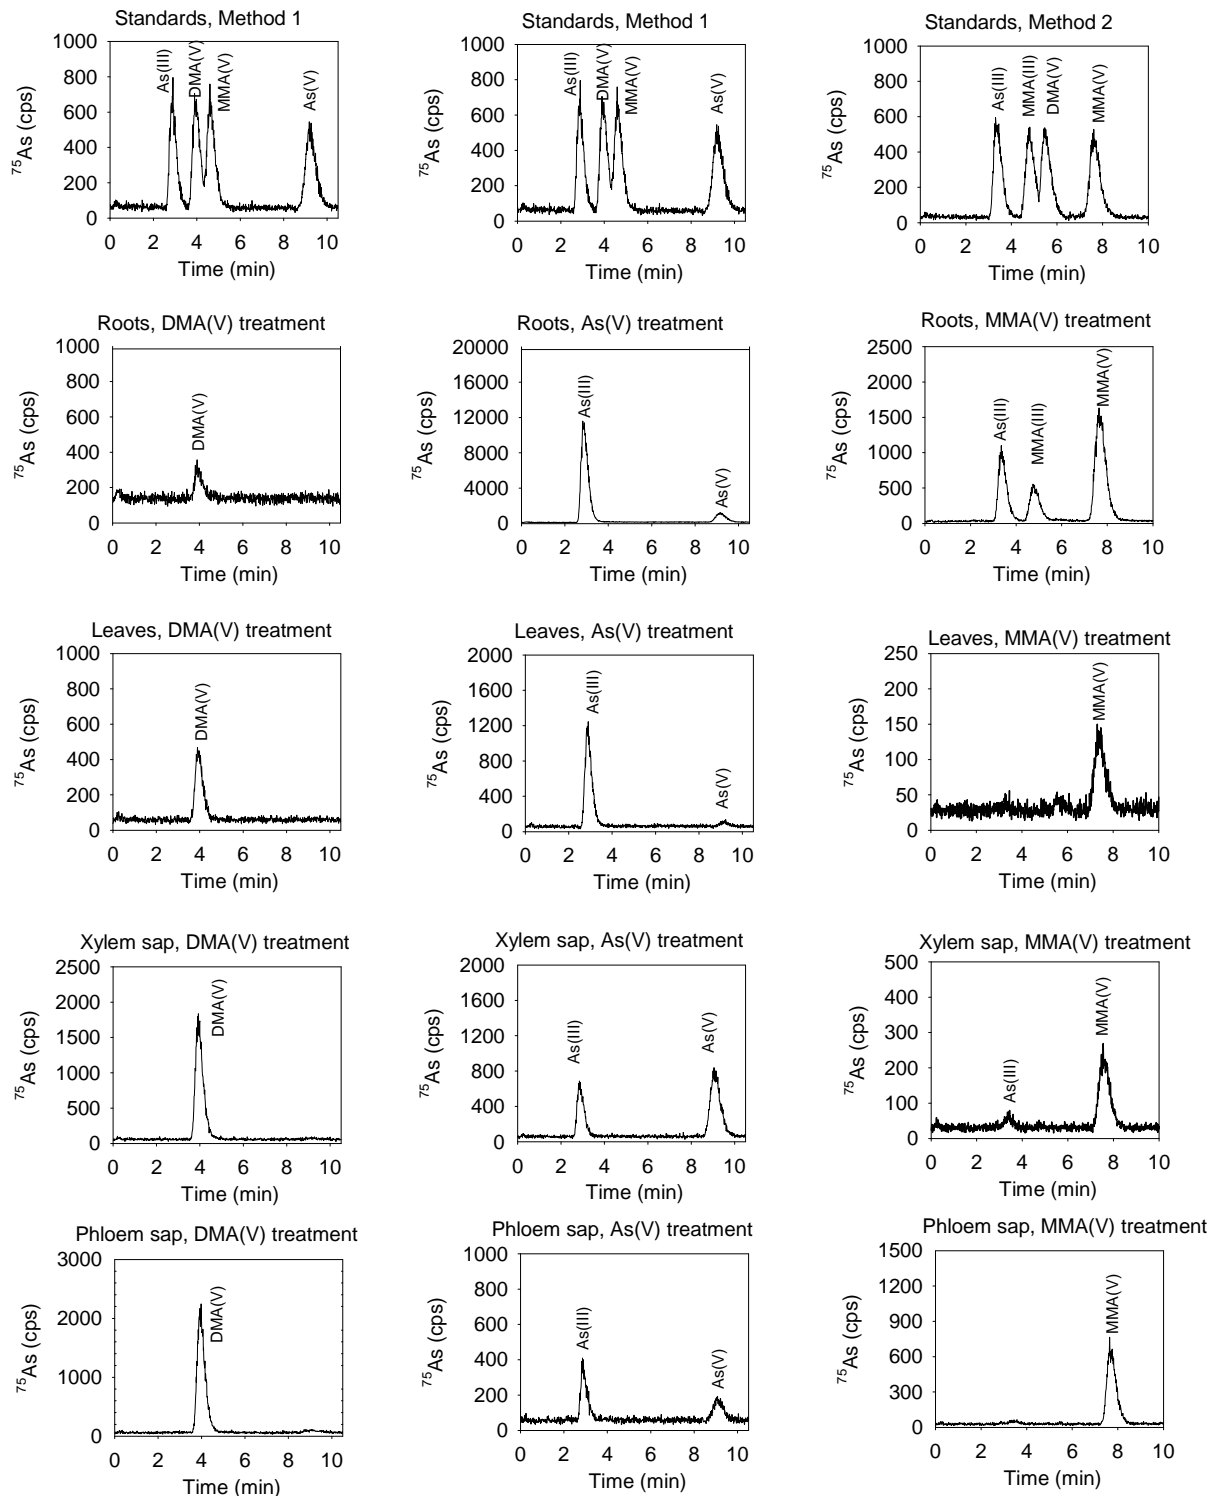

Supplement: pp.110.163261_1.pdf [file pp.110.163261_1.pdf]
